# Supplementary material for: SARS-CoV-2 entry factors are highly expressed in nasal epithelial cells together with innate immune genes
Source: Springer Nature journal article supplement (doi:10.1038/s41591-020-0868-6), 2020-04-23
Supplement: 41591_2020_868_MOESM1_ESM.pdf [file 41591_2020_868_MOESM1_ESM.pdf]

In the format provided by the authors and unedited.

# SARS-CoV-2 entry factors are highly expressed in nasal epithelial cells together with innate immune genes

Waradon Sungnak<sup>1</sup>✉, Ni Huang<sup>1</sup>, Christophe Bécavin<sup>2</sup>, Marijn Berg<sup>3,4</sup>, Rachel Queen<sup>5</sup>, Monika Litvinukova<sup>1,6</sup>, Carlos Talavera-López<sup>1</sup>, Henrike Maatz<sup>6</sup>, Daniel Reichart<sup>7</sup>, Fotios Sampaziotis<sup>8,9,10</sup>, Kaylee B. Worlock<sup>11</sup>, Masahiro Yoshida<sup>11</sup>, Josephine L. Barnes<sup>11</sup> and HCA Lung Biological Network<sup>\*✉</sup>

---

<sup>1</sup>Wellcome Sanger Institute, Cambridge, UK. <sup>2</sup>Université Côte d'Azur, CNRS, IPMC, Sophia-Antipolis, France. <sup>3</sup>Department of Pathology and Medical Biology, University Medical Centre Groningen, University of Groningen, Groningen, the Netherlands. <sup>4</sup>Groningen Research Institute for Asthma and COPD, University Medical Centre Groningen, University of Groningen, Groningen, the Netherlands. <sup>5</sup>Bioinformatics Core Facility, Newcastle University Biosciences Institute, Faculty of Medical Sciences, Newcastle University, Newcastle-upon-Tyne, UK. <sup>6</sup>Cardiovascular and Metabolic Sciences, Max Delbrück Center for Molecular Medicine in the Helmholtz Association (MDC), Berlin, Germany. <sup>7</sup>Department of Genetics, Harvard Medical School, Boston, MA, USA. <sup>8</sup>Wellcome and MRC Cambridge Stem Cell Institute, University of Cambridge, Cambridge, UK. <sup>9</sup>Department of Medicine, Addenbrookes Hospital, Cambridge, UK. <sup>10</sup>Cambridge Liver Unit, Cambridge University Hospitals, Cambridge, UK. <sup>11</sup>UCL Respiratory, Division of Medicine, University College London, London, UK. \*A list of authors and their affiliations appears at the end of the paper. ✉e-mail: [ws4@sanger.ac.uk](mailto:ws4@sanger.ac.uk); [lung@humancellatlas.org](mailto:lung@humancellatlas.org)

## Supplementary Table 1

| Genes   | GO Accession Number: Class              | PathCards                                                                |
|---------|-----------------------------------------|--------------------------------------------------------------------------|
| IDO1    | GO:0002376: immune system process       | NF-kappaB Signaling<br>Viral mRNA translation                            |
| PI3     | GO:0002376: immune system process       | Defensins, Innate Immune System                                          |
| CEACAM5 | GO:0002376: immune system process       | NF-kappaB Signaling                                                      |
| KYNU    | GO:0002376: immune system process       | Viral mRNA translation                                                   |
| TCN1    | GO:0002376: immune system process       | Innate Immune System<br>NF-kappaB Signaling                              |
| S100P   | GO:0002376: immune system process       | Innate Immune System                                                     |
| IRAK3   | GO:0002376: immune system process       | Innate Immune System                                                     |
| TNFSF10 | GO:0002376: immune system process       | TNF signaling                                                            |
| NOS2    | GO:0002376: immune system process       | Innate Immune System                                                     |
| PTGES   | GO:0002526: acute inflammatory response | Prostaglandin 2 biosynthesis and metabolism FM                           |
| MDK     | GO:0002376: immune system process       | NF-KappaB Family Pathway                                                 |
| RAB37   | GO:0002376: immune system process       | Innate Immune System                                                     |
| ASS1    | GO:0002376: immune system process       | Viral mRNA Translation                                                   |
| OAS1    | GO:0002376: immune system process       | Innate Immune System<br>Immune response IFN alpha/beta signaling pathway |
| MX1     | GO:0002376: immune system process       | Innate Immune System<br>Immune response IFN alpha/beta signaling pathway |

**Supplementary Table 1** | Immune-associated genes in respiratory epithelial expression from the top 50 genes correlated with *ACE2* expression based on Spearman correlation analysis (with Benjamini-Hochberg-adjusted *p*-values) across all cells within the Vieira Braga, Kar *et al.* lung epithelial dataset. The characterization of genes was based on Gene Ontology classes from the Gene Ontology (GO) database and associated pathways in PathCards from the Pathway Unification Database.
